# Supplementary material
Source: PubMed Central journal article supplement (PMC5316490)
Supplement: NIHMS834082-supplement-1.pdf [file NIHMS834082-supplement-1.pdf]

# **Tremelimumab in combination with ablation in patients with advanced hepatocellular carcinoma**

Austin G. Duffy, Susanna V. Ulahannan, Oxana Makorova-Rusher, Osama Rahma,  
Heiner Wedemeyer, Drew Pratt, Jeremy L. Davis, Marybeth S. Hughes, Theo Heller,  
Mei ElGindi, Ashish Uppala, Firouzeh Korangy, David E. Kleiner, William D. Figg, David  
Venzon, Seth M. Steinberg, Aradhana M. Venkatesan, Venkatesh Krishnasamy, Nadine  
Abi-Jaoudeh, Elliot Levy, Brad J. Wood, Tim F. Greten

## **Table of contents**

|                                   |          |
|-----------------------------------|----------|
| <b>List of investigators.....</b> | <b>2</b> |
| <b>Supplementary Fig. 1.....</b>  | <b>3</b> |
| <b>Supplementary Fig. 2.....</b>  | <b>4</b> |
| <b>Supplementary Fig. 3.....</b>  | <b>5</b> |
| <b>Supplementary Fig. 4.....</b>  | <b>6</b> |
| <b>Supplementary Table 1.....</b> | <b>7</b> |

## List of investigators

Austin G. Duffy<sup>1</sup>, Susanna V. Ulahannan<sup>1</sup>, Oxana Makorova-Rusher<sup>1</sup>, Osama Rahma<sup>1</sup>, Heiner Wedemeyer<sup>2</sup>, Drew Pratt<sup>3</sup>, Jeremy L. Davis<sup>4</sup>, Marybeth S. Hughes<sup>4</sup>, Theo Heller<sup>5</sup>, Mei ElGindi<sup>1</sup>, Ashish Uppala,<sup>1</sup> Firouzeh Korangy<sup>1</sup>, David E. Kleiner<sup>3</sup>, William D. Figg<sup>6</sup>, David Venzon<sup>7</sup>, Seth M. Steinberg<sup>7</sup>, Aradhana M. Venkatesan<sup>8</sup>, Venkatesh Krishnasamy<sup>8</sup>, Nadine Abi-Jaoudeh<sup>8</sup>, Elliot Levy<sup>8</sup>, Brad J. Wood<sup>8</sup>, Tim F. Greten<sup>1</sup>.

1 Gastrointestinal Malignancies Section, Thoracic and GI Oncology Branch, Center for Cancer Research, National Cancer Institute, National Institutes of Health.

2 Department of Gastroenterology, Hepatology and Endocrinology, Hannover Medical School.

3 Laboratory of Pathology, Center for Cancer Research, National Cancer Institute, National Institutes of Health.

4 Thoracic and GI Oncology Branch, Center for Cancer Research, National Cancer Institute, National Institutes of Health.

5 Translational Hepatology Unit, Liver Diseases Branch (LDB), National Institute of Diabetes and Digestive and Kidney Disease (NIDDK) National Institutes of Health.

6 Clinical Pharmacology Program, Center for Cancer Research, National Cancer Institute, National Institutes of Health

7 Biostatistics and Data Management Section, Center for Cancer Research, National Cancer Institute, National Institutes of Health

8 Center for Interventional Oncology, Radiology and Imaging Sciences and Center for Cancer Research, National Institutes of Health

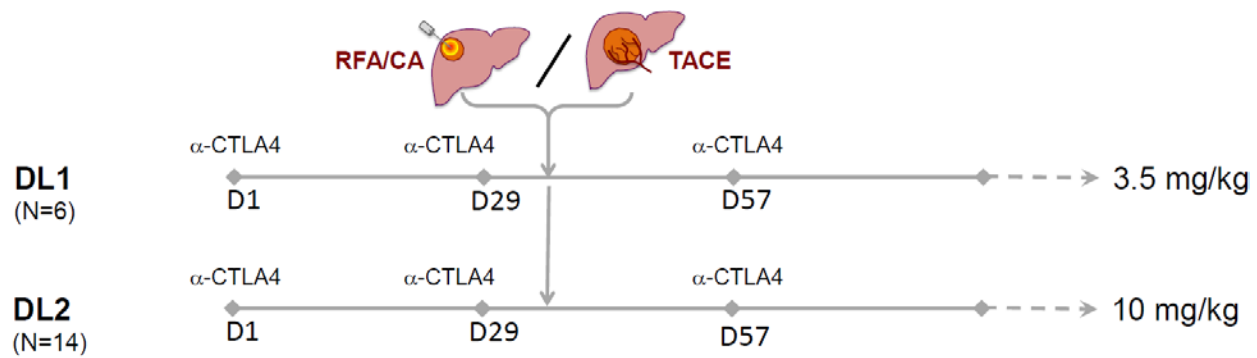

Supplementary Fig 1: Study schema showing timing of study interventions.

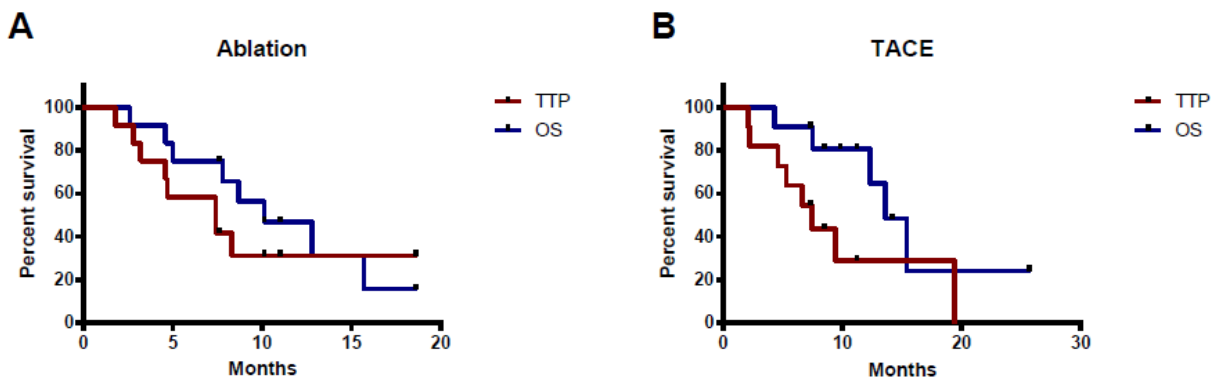

Supplementary Fig 2: Kaplan Meier curves showing (A) TTP and OS for patients who underwent ablation and (B) TTP and OS for patients who underwent TACE .

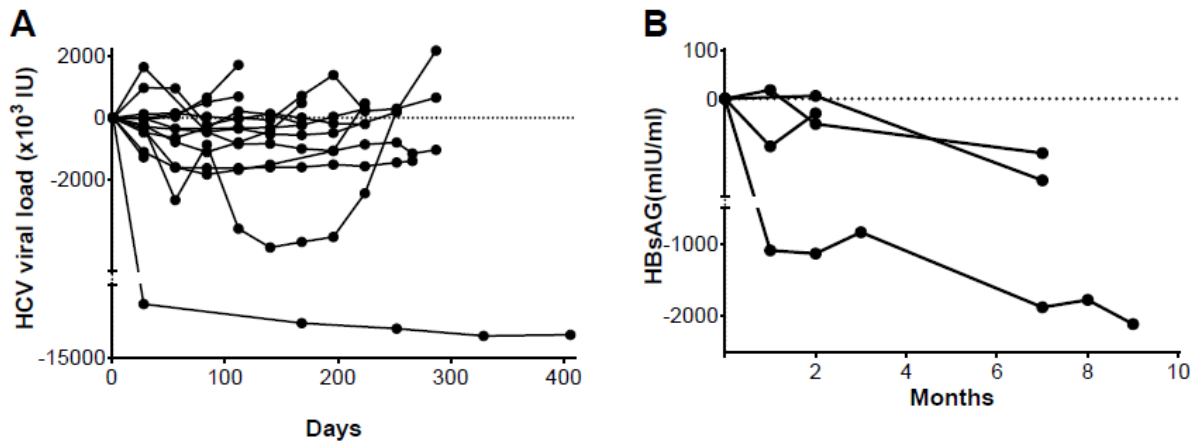

Supplementary Fig 3: (A) Relative changes in HCV viral load (iu/ml) over time for all evaluable patients; (B) Quantitative hepatitis B surface antigen for N=4 patients with hepatitis B.

Patient A

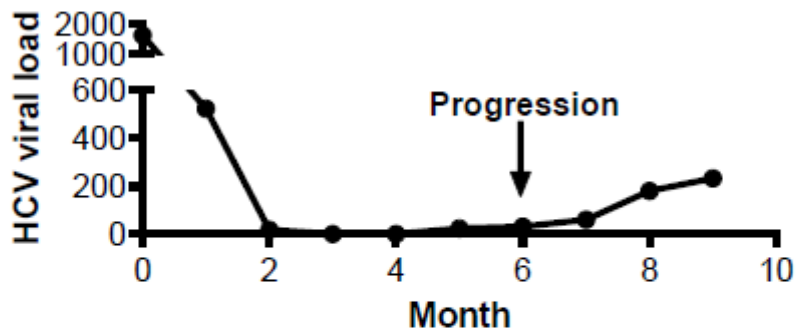

Patient B

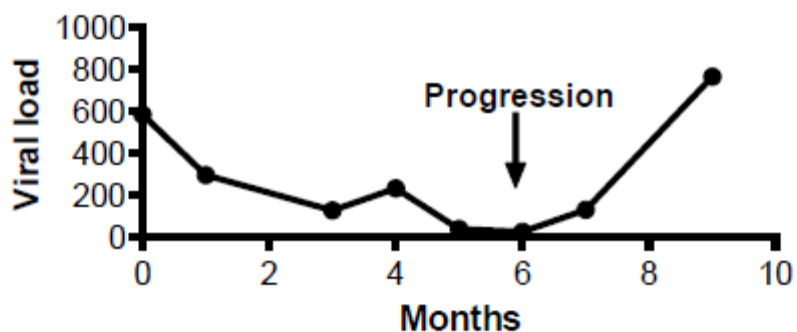

Patient C

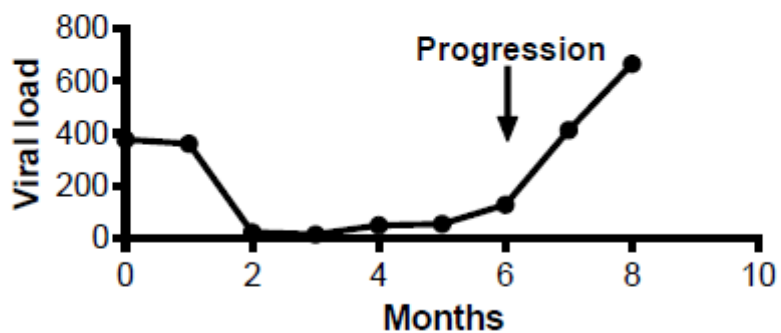

Supplementary Figure 4:  
**Supplementary Figure 4**

Data for N=3 patients demonstrating reduction in HCV viral load had a subsequent increase in VL which coincided with disease progression

Supplementary Table 1

| Study pt no. | Prior therapies                                                                       | Description of disease burden                                                                 | IR intervention                                                                                                        | Measureable lesions <u>not</u> subject to ablation/TACE       |                                                                 |                                                              |                                                            |
|--------------|---------------------------------------------------------------------------------------|-----------------------------------------------------------------------------------------------|------------------------------------------------------------------------------------------------------------------------|---------------------------------------------------------------|-----------------------------------------------------------------|--------------------------------------------------------------|------------------------------------------------------------|
|              |                                                                                       |                                                                                               |                                                                                                                        | Baseline                                                      | After 2 months                                                  | After 4 months                                               | After 6 months                                             |
| 3            | Partial hepatectomy x2; TACEx3; Radioembolization; GEMOX, FOLFOX, Avastin + erlotinib | 5 measurable lesions, all intrahepatic                                                        | <u>Complete</u> RFA to one lesion only                                                                                 | L1: 5cm<br>L2: 2.2cm<br>L3: 1.8cm<br>L4: 2.9cm<br>Sum: 11.9cm | L1: 5.9cm<br>L2: 2.6cm<br>L3: 2.3cm<br>L4: 5.3cm<br>Sum: 16.1cm | L1: 5cm<br>L2: 1.6cm<br>L3: 0.8cm<br>L4: 2.5cm<br>Sum: 9.9cm | L1: 3.5cm<br>L2: 1cm<br>L3: 0.6cm<br>L4: 2cm<br>Sum: 7.1cm |
| 8            | TACEx2; Brivanib; RT to liver                                                         | 3 measurable lesions, all intrahepatic                                                        | <u>Complete</u> RFA to one lesion only; Other 2 lesions followed for RECIST                                            | L1: 1.8 cm<br>L2: 1.4cm<br>Sum: 3.2cm                         | L1: 1cm<br>L2: 0.7cm<br>Sum: 1.7cm                              | L1: 0.8cm<br>L2: 0.4cm<br>Sum: 1.2cm                         | L1: 0.7cm<br>L2: 0<br>Sum: 0.7cm                           |
| 10           | TACEx3                                                                                | One measurable lesion, all intrahepatic. Multiple lesions visible on arteriography            | <u>Complete</u> TACE (to small lesion not visible on CT scan)                                                          | L1: 10.2cm                                                    | L1: 6.5cm                                                       | L1: 4.8cm                                                    | L1: 4.8cm                                                  |
| 17           | RFA x 2                                                                               | 4 measurable lesions, all intrahepatic                                                        | <u>Complete</u> TACE to RT liver; x1 lesion in Lt lobe followed for RECIST (and not treated with TACE given shrinkage) | L1: 3.6 cm                                                    | L1: 2.2cm                                                       | L1: 1.8cm                                                    | L1: 1.6cm                                                  |
| 25           | TACE x 4                                                                              | 1 measurable lesion in Left lobe of liver, with diffuse mass and tumor infiltration centrally | Cryoablation to central tumor area <u>ie incomplete</u>                                                                | L1: 4 cm                                                      | L1: 3.2cm                                                       | L1: 3 cm                                                     | L1: 2.5cm                                                  |

Data describing the measurable lesions in N=5 responding patients.
